# Supplementary material
Source: PubMed Central journal article supplement (PMC8177735)
Supplement: NIHMS1707498-supplement-eAppendix.pdf [file NIHMS1707498-supplement-eAppendix.pdf]

**eAppendix Table.** Odds Ratios, Confidence Intervals, and P-Values From Mixed Effects Logistic Regressions Predicting 2015-2016 Patient Satisfaction Outcomes

|                                                 | Urgent Access (N=69,888) |                |         | Urgent Care Wait (N=67,572) |                |         | Routine Access (N=227,429) |                |         | Questions Answered (N=227,429) |                |         | Provider Rating (N=227,429) |                |         |
|-------------------------------------------------|--------------------------|----------------|---------|-----------------------------|----------------|---------|----------------------------|----------------|---------|--------------------------------|----------------|---------|-----------------------------|----------------|---------|
|                                                 | Beta                     | 95% CI         | P-value | Beta                        | 95% CI         | P-value | Beta                       | 95% CI         | P-value | Beta                           | 95% CI         | P-value | Beta                        | 95% CI         | P-value |
| Avg. Speed of Answer (in seconds, ref = Q1)     |                          |                |         |                             |                |         |                            |                |         |                                |                |         |                             |                |         |
| Q2 (35.9 to 58.9)                               | 0.957                    | (0.890, 1.029) | 0.237   | 0.931*                      | (0.880, 0.986) | 0.014   | 1.005                      | (0.973, 1.039) | 0.742   | 1.022                          | (0.990, 1.055) | 0.179   | 0.987                       | (0.950, 1.026) | 0.506   |
| Q3 (59.0 to 107.6)                              | 0.933                    | (0.857, 1.017) | 0.113   | 0.959                       | (0.895, 1.026) | 0.224   | 1.001                      | (0.961, 1.042) | 0.969   | 1.012                          | (0.973, 1.051) | 0.556   | 0.987                       | (0.943, 1.034) | 0.588   |
| Q4 (107.7 to 351.3)                             | 0.849**                  | (0.761, 0.946) | 0.003   | 0.844***                    | (0.772, 0.922) | <.001   | 0.990                      | (0.939, 1.044) | 0.717   | 1.004                          | (0.955, 1.055) | 0.871   | 0.953                       | (0.899, 1.011) | 0.111   |
| Abandonment Rate (% , ref = Q1)                 |                          |                |         |                             |                |         |                            |                |         |                                |                |         |                             |                |         |
| Q2 (6.1 to 10.2)                                | 1.045                    | (0.977, 1.119) | 0.198   | 1.026                       | (0.973, 1.081) | 0.341   | 0.994                      | (0.964, 1.024) | 0.695   | 0.988                          | (0.959, 1.018) | 0.424   | 1.032                       | (0.996, 1.07)  | 0.080   |
| Q3 (10.3 to 16.2)                               | 1.033                    | (0.945, 1.128) | 0.478   | 1.007                       | (0.939, 1.08)  | 0.839   | 0.993                      | (0.954, 1.035) | 0.751   | 0.999                          | (0.960, 1.039) | 0.965   | 1.038                       | (0.991, 1.089) | 0.116   |
| Q4 (16.3 to 29.1)                               | 1.103                    | (0.989, 1.231) | 0.078   | 1.056                       | (0.967, 1.153) | 0.223   | 1.051                      | (0.999, 1.107) | 0.057   | 1.018                          | (0.969, 1.069) | 0.474   | 1.042                       | (0.983, 1.104) | 0.171   |
| Average Appointment Age (in days, ref = Q1)     |                          |                |         |                             |                |         |                            |                |         |                                |                |         |                             |                |         |
| Q3 (10 to 21)                                   | 0.858***                 | (0.81, 0.909)  | <.001   | 0.982                       | (0.938, 1.027) | 0.425   | 1.075***                   | (1.046, 1.105) | <.001   | 0.742***                       | (0.722, 0.763) | <.001   | 1.055**                     | (1.021, 1.091) | 0.001   |
| Q3 (22 to 33)                                   | 0.799***                 | (0.75, 0.852)  | <.001   | 1.041                       | (0.99, 1.096)  | 0.116   | 1.046**                    | (1.016, 1.077) | 0.002   | 0.675***                       | (0.656, 0.695) | <.001   | 1.073***                    | (1.036, 1.111) | <.001   |
| Q4 (34 to 550)                                  | 0.744***                 | (0.703, 0.788) | <.001   | 1.198***                    | (1.145, 1.254) | <.001   | 0.948***                   | (0.923, 0.973) | <.001   | 0.662***                       | (0.644, 0.68)  | <.001   | 1.123***                    | (1.087, 1.16)  | <.001   |
| Monthly Primary Care Visit Volume (#, ref = Q1) |                          |                |         |                             |                |         |                            |                |         |                                |                |         |                             |                |         |
| Q2 (1,630 to 2,614)                             | 1.018                    | (0.924, 1.121) | 0.720   | 1.005                       | (0.929, 1.087) | 0.903   | 0.977                      | (0.931, 1.026) | 0.352   | 1.028                          | (0.985, 1.073) | 0.208   | 1.033                       | (0.982, 1.087) | 0.205   |
| Q3 (2,615 to 4,086)                             | 1.055                    | (0.951, 1.17)  | 0.310   | 0.999                       | (0.918, 1.088) | 0.988   | 0.957                      | (0.906, 1.011) | 0.115   | 1.020                          | (0.973, 1.069) | 0.416   | 1.055                       | (0.999, 1.115) | 0.054   |
| Q4 (4,087 to 15,432)                            | 0.950                    | (0.847, 1.067) | 0.388   | 0.974                       | (0.885, 1.073) | 0.595   | 0.953                      | (0.894, 1.015) | 0.135   | 1.033                          | (0.979, 1.089) | 0.239   | 1.035                       | (0.973, 1.101) | 0.279   |
| Monthly Call Volume (#, ref = Q1)               |                          |                |         |                             |                |         |                            |                |         |                                |                |         |                             |                |         |
| Q2 (7,707 to 14,476)                            | 1.056                    | (0.952, 1.173) | 0.304   | 0.987                       | (0.909, 1.071) | 0.747   | 0.946*                     | (0.899, 0.996) | 0.0338* | 1.011                          | (0.965, 1.058) | 0.647   | 1.077**                     | (1.02, 1.138)  | 0.007   |
| Q3 (14,477 to 23,522)                           | 0.988                    | (0.886, 1.101) | 0.827   | 0.938                       | (0.86, 1.024)  | 0.152   | 0.966                      | (0.914, 1.021) | 0.215   | 0.994                          | (0.947, 1.044) | 0.814   | 1.015                       | (0.958, 1.075) | 0.619   |
| Q4 (23,523 to 151,379)                          | 0.970                    | (0.862, 1.091) | 0.614   | 0.947                       | (0.859, 1.043) | 0.268   | 0.991                      | (0.93, 1.055)  | 0.771   | 1.015                          | (0.962, 1.071) | 0.590   | 1.026                       | (0.963, 1.094) | 0.422   |
| Average Response Rate (%)                       | 1.012***                 | (1.006, 1.019) | <.001   | 1.010***                    | (1.005, 1.015) | <.001   | 1.003                      | (0.999, 1.006) | 0.114   | 1.007***                       | (1.005, 1.01)  | <.001   | 1.003                       | (1, 1.006)     | 0.067   |
| Average Survey Response Time (days)             | 1.000                    | (0.998, 1.002) | 0.960   | 0.999                       | (0.997, 1)     | 0.099   | 0.993***                   | (0.993, 0.994) | <.001   | 0.997***                       | (0.996, 0.998) | <.001   | 0.996***                    | (0.995, 0.997) | <.001   |
| Covered Facility Status (ref = not covered)     | 0.943                    | (0.832, 1.069) | 0.362   | 0.901                       | (0.809, 1.004) | 0.058   | 0.853***                   | (0.784, 0.927) | <.001   | 0.929*                         | (0.876, 0.985) | 0.014   | 1.043                       | (0.974, 1.116) | 0.229   |
| College Attainment (ref = none)                 | 0.883***                 | (0.843, 0.925) | <.001   | 0.981                       | (0.946, 1.017) | 0.291   | 1.259***                   | (1.234, 1.284) | <.001   | 1.266***                       | (1.24, 1.292)  | <.001   | 0.938***                    | (0.916, 0.962) | <.001   |

|                                                 |          |                 |       |          |                |       |          |                |         |          |                |        |          |                |       |
|-------------------------------------------------|----------|-----------------|-------|----------|----------------|-------|----------|----------------|---------|----------|----------------|--------|----------|----------------|-------|
| Sex (ref = male)                                | 0.767*** | (0.707, 0.833)  | <.001 | 1.019    | (0.947, 1.096) | 0.622 | 1.063**  | (1.015, 1.112) | 0.009   | 1.065**  | (1.017, 1.115) | 0.007  | 1.185*** | (1.122, 1.252) | <.001 |
| Race/Ethnicity (ref = non-Black, non-Hispanic)  |          |                 |       |          |                |       |          |                |         |          |                |        |          |                |       |
| Black                                           | 0.966    | (0.904, 1.032)  | 0.303 | 0.890*** | (0.842, 0.941) | <.001 | 0.761*** | (0.736, 0.788) | <.001   | 0.988    | (0.954, 1.024) | 0.507  | 0.923*** | (0.885, 0.962) | <.001 |
| Hispanic                                        | 0.949    | (0.861, 1.045)  | 0.288 | 0.915*   | (0.842, 0.995) | 0.039 | 0.810*** | (0.77, 0.852)  | <.001   | 0.987    | (0.935, 1.041) | 0.623  | 1.118*** | (1.049, 1.19)  | <.001 |
| Respondent Age Group (years, ref = 18-29)       |          |                 |       |          |                |       |          |                |         |          |                |        |          |                |       |
| 30 to 49                                        | 1.074    | (0.847, 1.362)  | 0.555 | 1.013    | (0.797, 1.288) | 0.914 | 1.218**  | (1.066, 1.392) | 0.004   | 1.150    | (0.991, 1.335) | 0.065  | 1.187*   | (1.017, 1.385) | 0.030 |
| 50 to 64                                        | 1.543*** | (1.224, 1.945)  | <.001 | 1.203    | (0.952, 1.519) | 0.121 | 1.355*** | (1.19, 1.542)  | <.001   | 1.269**  | (1.097, 1.467) | 0.001  | 1.544*** | (1.329, 1.795) | <.001 |
| 65+                                             | 1.947*** | (1.545, 2.454)  | <.001 | 1.319*   | (1.045, 1.665) | 0.020 | 1.363*** | (1.198, 1.551) | <.001   | 1.073    | (0.928, 1.24)  | 0.341  | 1.825*** | (1.571, 2.12)  | <.001 |
| Self-Reported Physical Health (ref = Excellent) |          |                 |       |          |                |       |          |                |         |          |                |        |          |                |       |
| Very Good                                       | 0.779*** | (0.678, 0.895)  | <.001 | 0.804*** | (0.739, 0.875) | <.001 | 0.924**  | (0.882, 0.969) | 0.001   | 1.013    | (0.968, 1.061) | 0.579  | 0.740*** | (0.693, 0.789) | <.001 |
| Good                                            | 0.674*** | (0.589, 0.771)  | <.001 | 0.751*** | (0.692, 0.816) | <.001 | 0.835*** | (0.796, 0.874) | <.001   | 1.115*** | (1.066, 1.168) | <.001  | 0.593*** | (0.556, 0.632) | <.001 |
| Fair                                            | 0.534*** | (0.465, 0.613)  | <.001 | 0.705*** | (0.646, 0.768) | <.001 | 0.718*** | (0.683, 0.754) | <.001   | 1.240*** | (1.182, 1.302) | <.001  | 0.547*** | (0.512, 0.585) | <.001 |
| Poor                                            | 0.434*** | (0.373, 0.504)  | <.001 | 0.645*** | (0.581, 0.716) | <.001 | 0.632*** | (0.595, 0.671) | <.001   | 1.359*** | (1.279, 1.444) | <.001  | 0.506*** | (0.467, 0.547) | <.001 |
| Self-Reported Mental Health (ref = Excellent)   |          |                 |       |          |                |       |          |                |         |          |                |        |          |                |       |
| Very Good                                       | 1.004    | (0.931, 1.082)  | 0.916 | 1.000    | (0.948, 1.055) | 0.996 | 0.993    | (0.965, 1.022) | 0.642   | 1.037*   | (1.007, 1.067) | 0.0134 | 0.818*** | (0.789, 0.848) | <.001 |
| Good                                            | 1.030    | (0.955, 1.11)   | 0.446 | 0.949    | (0.899, 1.003) | 0.063 | 0.947*** | (0.918, 0.976) | <.001   | 1.112*** | (1.078, 1.146) | <.001  | 0.746*** | (0.718, 0.775) | <.001 |
| Fair                                            | 0.954    | (0.881, 1.033)  | 0.242 | 0.906**  | (0.852, 0.963) | 0.002 | 0.904*** | (0.873, 0.936) | <.001   | 1.227*** | (1.184, 1.271) | <.001  | 0.739*** | (0.708, 0.772) | <.001 |
| Poor                                            | 0.774*** | (0.698, 0.859)  | <.001 | 0.783*** | (0.715, 0.856) | <.001 | 0.782*** | (0.741, 0.825) | <.001   | 1.174*** | (1.111, 1.241) | <.001  | 0.733*** | (0.687, 0.783) | <.001 |
| Survey Language (1 = English)                   | 1.030    | (0.853, 1.244)  | 0.758 | 0.861    | (0.731, 1.013) | 0.071 | 1.143*   | (1.032, 1.265) | 0.010   | 1.150*   | (1.032, 1.281) | 0.011  | 1.005    | (0.887, 1.138) | 0.943 |
| Survey Assistance Received (1 = yes)            | 1.030    | (0.946, 1.121)  | 0.497 | 0.978    | (0.912, 1.048) | 0.528 | 0.873*** | (0.841, 0.907) | <.001   | 0.986    | (0.949, 1.025) | 0.4853 | 0.988    | (0.944, 1.033) | 0.589 |
| Staff Were Helpful (ref = Never)                |          |                 |       |          |                |       |          |                |         |          |                |        |          |                |       |
| Sometimes                                       | 1.75***  | (1.5, 2.042)    | <.001 | 1.368**  | (1.117, 1.676) | 0.003 | 1.728*** | (1.566, 1.907) | <.001   | 1.756*** | (1.532, 2.014) | <.001  | 1.301*** | (1.159, 1.46)  | <.001 |
| Usually                                         | 4.735*** | (4.038, 5.552)  | <.001 | 2.299*** | (1.87, 2.825)  | <.001 | 3.125*** | (2.828, 3.454) | <.001   | 2.789*** | (2.43, 3.202)  | <.001  | 2.037*** | (1.813, 2.289) | <.001 |
| Always                                          | 9.135*** | (7.763, 10.749) | <.001 | 3.743*** | (3.04, 4.608)  | <.001 | 3.747*** | (3.386, 4.146) | <.001   | 3.343*** | (2.91, 3.842)  | <.001  | 3.690*** | (3.28, 4.15)   | <.001 |
| Staff Showed Respect (ref = Never)              |          |                 |       |          |                |       |          |                |         |          |                |        |          |                |       |
| Sometimes                                       | 1.052    | (0.852, 1.298)  | 0.638 | 1.225    | (0.926, 1.619) | 0.155 | 1.095    | (0.957, 1.253) | 0.187   | 1.076    | (0.896, 1.292) | 0.4343 | 0.965    | (0.825, 1.13)  | 0.660 |
| Usually                                         | 1.120    | (0.905, 1.385)  | 0.298 | 1.141    | (0.861, 1.511) | 0.359 | 1.167    | (1.02, 1.335)  | 0.025*  | 1.175    | (0.979, 1.41)  | 0.0835 | 0.980    | (0.837, 1.147) | 0.802 |
| Always                                          | 1.072    | (0.865, 1.329)  | 0.524 | 1.146    | (0.865, 1.52)  | 0.343 | 1.189    | (1.038, 1.361) | 0.0124* | 1.171    | (0.975, 1.406) | 0.0911 | 1.088    | (0.929, 1.274) | 0.297 |
| Time (months)                                   | 1.013*** | (1.009, 1.017)  | <.001 | 1.004*   | (1, 1.007)     | 0.033 | 0.997**  | (0.996, 0.999) | 0.009   | 1.016*** | (1.014, 1.017) | <.001  | 1.009*** | (1.007, 1.012) | <.001 |

|                                                           |          |                |       |          |                |       |          |                |       |          |                |       |          |                |       |
|-----------------------------------------------------------|----------|----------------|-------|----------|----------------|-------|----------|----------------|-------|----------|----------------|-------|----------|----------------|-------|
| Length of patient/provider relationship (ref = <6 months) |          |                |       |          |                |       |          |                |       |          |                |       |          |                |       |
| 6 months to <5 years                                      | 0.895*** | (0.845, 0.948) | <.001 | 0.836*** | (0.796, 0.879) | <.001 | 0.604*** | (0.59, 0.619)  | <.001 | 0.697*** | (0.679, 0.715) | <.001 | 0.683*** | (0.664, 0.702) | <.001 |
| 5 years or more                                           | 0.760*** | (0.709, 0.816) | <.001 | 0.730*** | (0.69, 0.773)  | <.001 | 0.54***  | (0.525, 0.556) | <.001 | 0.637*** | (0.618, 0.657) | <.001 | 0.447*** | (0.431, 0.464) | <.001 |

\*p<0.05 \*\*p<0.01 \*\*\*p<0.001

Note: See Table 1 for exact question wordings of the outcome measures.
